# Supplementary material for: Influence of metal ions, coligands and reaction conditions on the structural versatility and properties of 5-pyrimidyl-tetrazolate containing complexes
Source: Royal Society of Chemistry journal article supplement (doi:10.1039/b910811d), 2009-01-01
Supplement: b910811d.pdf [file b910811d.pdf]

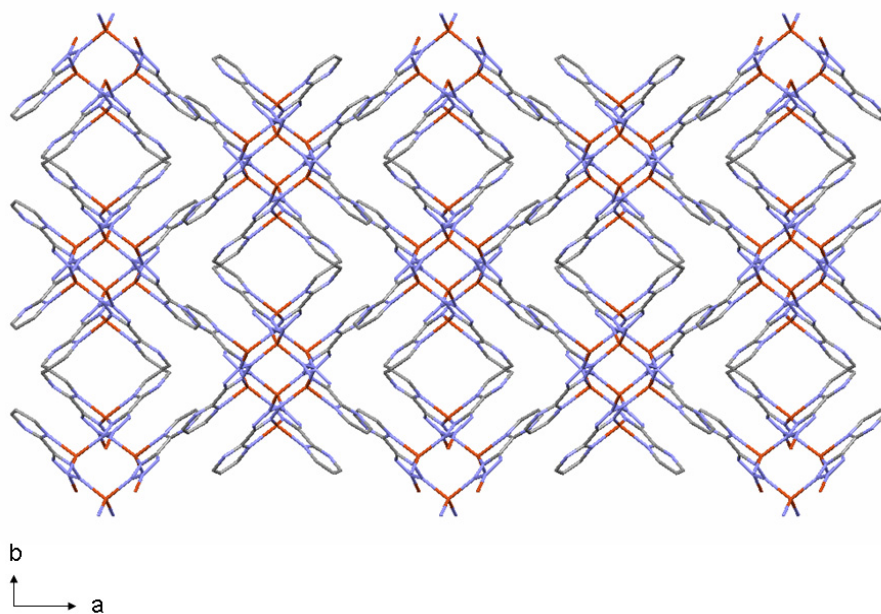

Figure S1.- A view of the structure of **1** down the *c* axis showing the  $\pi\cdots\pi$  interaction between double chains.

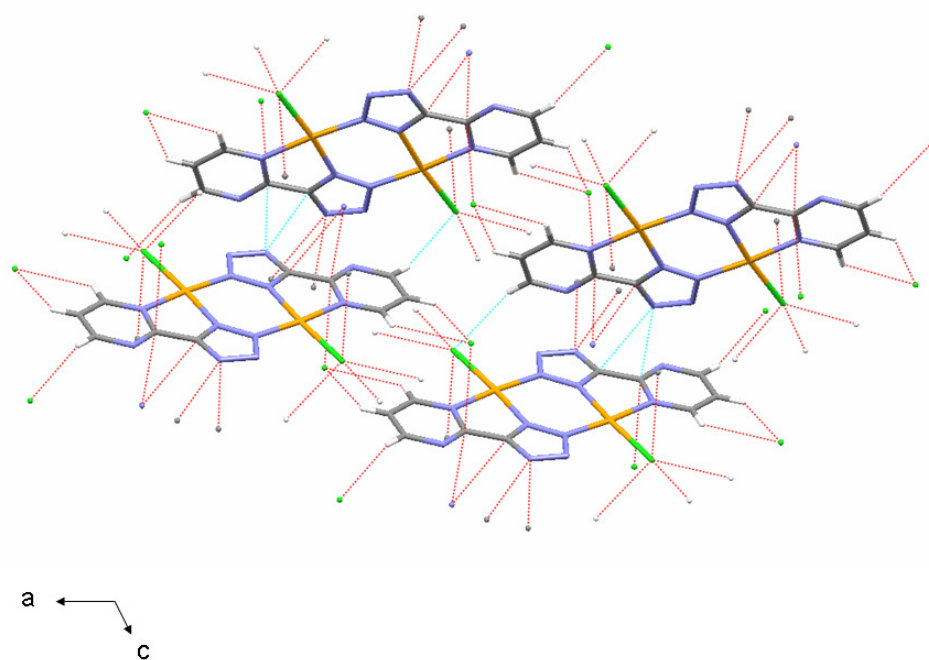

Figure S2.- View of the  $C\cdots H$  interactions in **2**.

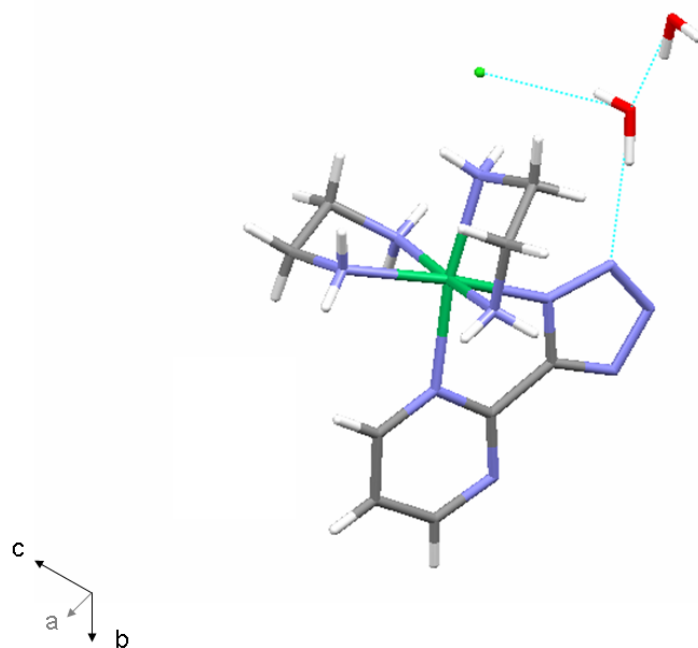

Figure S3.- Hydrogen bond interactions in **3**.

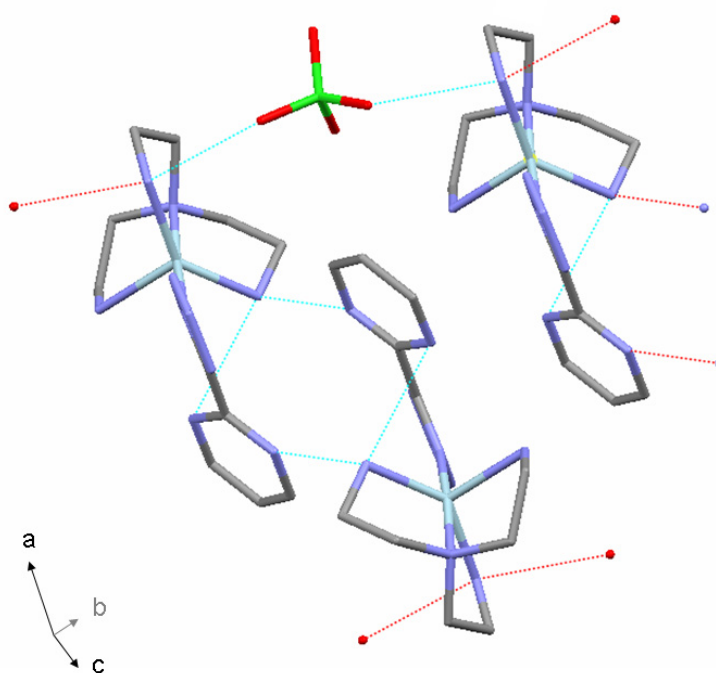

Figure S4.- View of the hydrogen bond interactions in **4**.

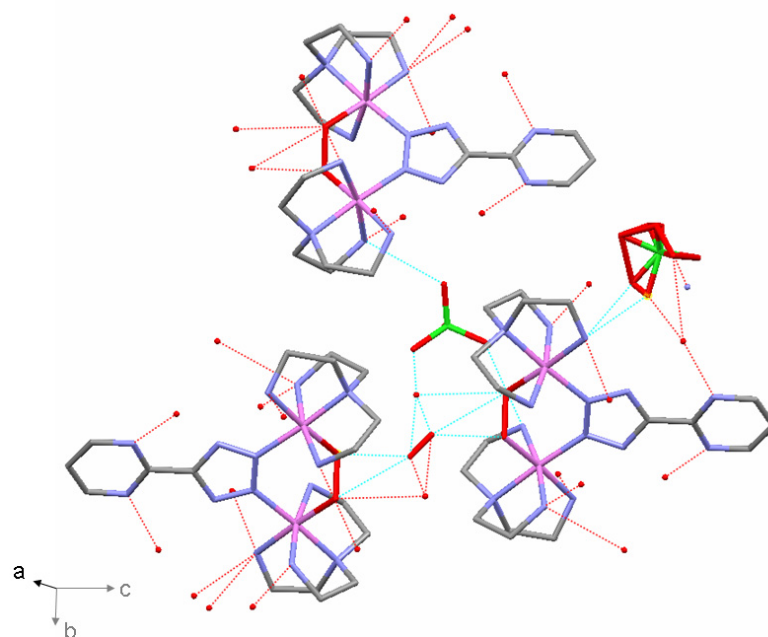

Figure S5.- A view of the hydrogen bond network in **5**.

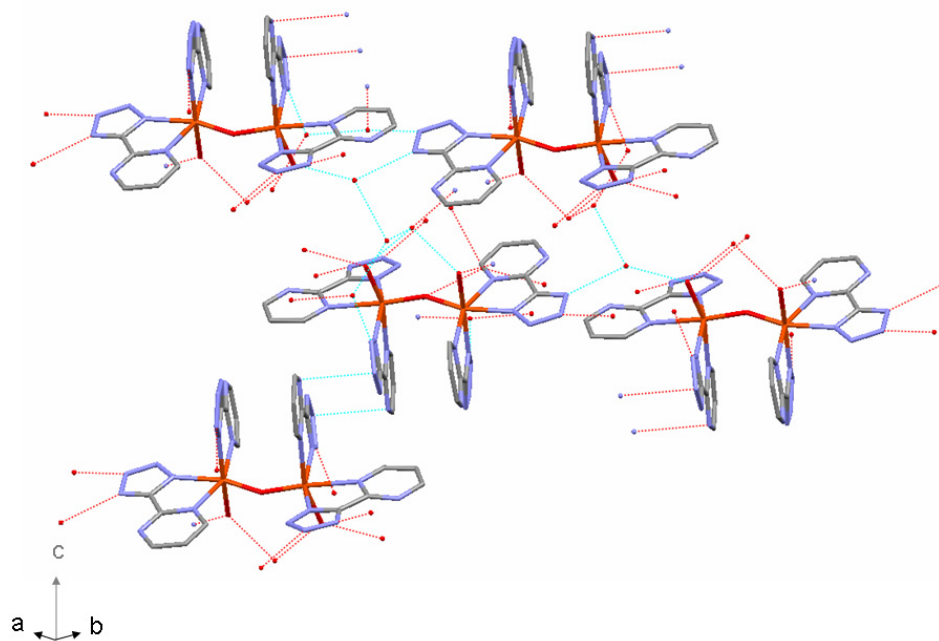

Figure S6.- A perspective view of the hydrogen bond array in **6**.

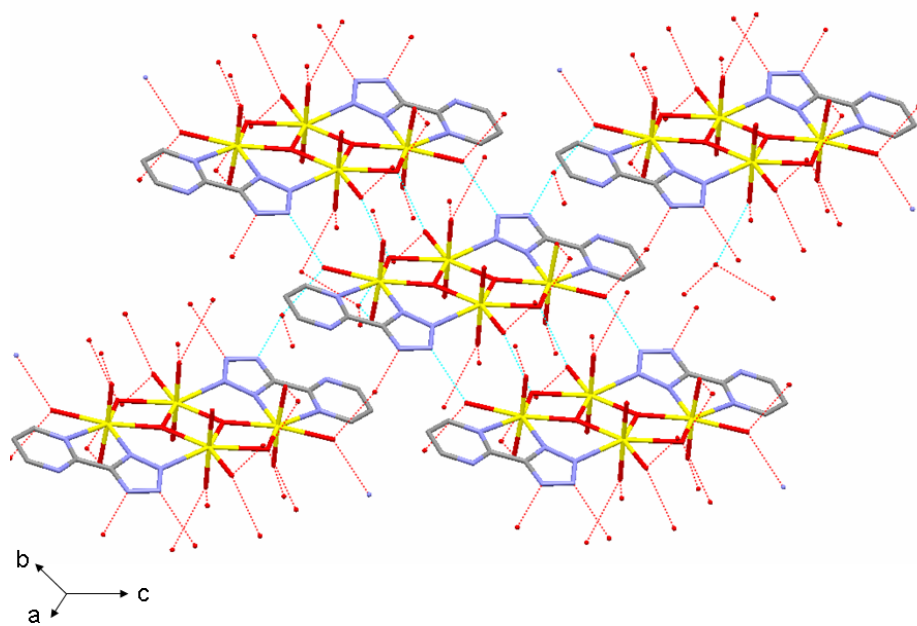

Figure S7.- A view of the hydrogen bond array in **7**.

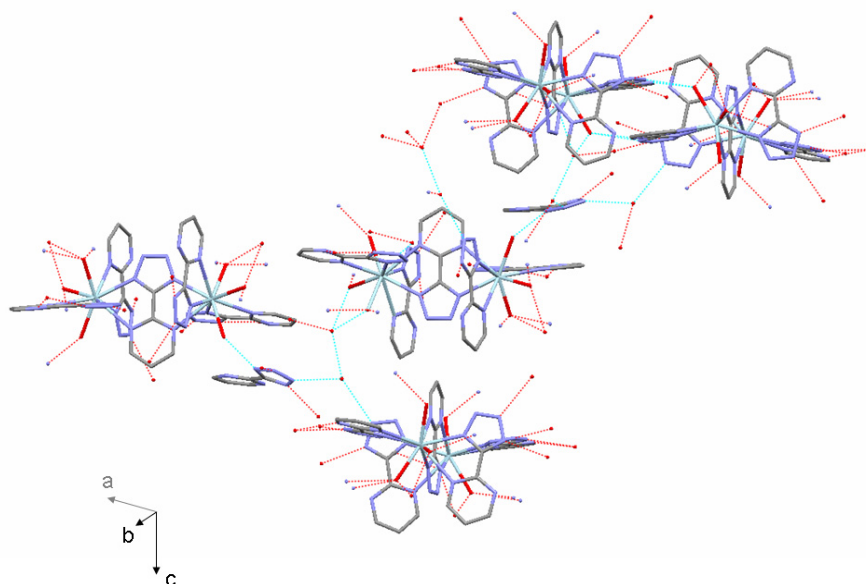

Figure S8.- A view of the hydrogen bond network in **8**.
